# Supplementary material for: Efficient lentiviral transduction method to gene modify cord blood CD8+ T cells for cancer therapy applications
Source: PubMed Central journal article supplement — Mol Ther Methods Clin Dev. 2021 Mar 23;21:357–68. doi: 10.1016/j.omtm.2021.03.015 (PMC8056177; doi:10.1016/j.omtm.2021.03.015), 2021-03-23
Supplement: mmc1.pdf [file mmc1.pdf]

**OMTM, Volume 21**

**Supplemental information**

**Efficient lentiviral transduction method  
to gene modify cord blood CD8<sup>+</sup> T cells  
for cancer therapy applications**

**Vania Lo Presti, Annelisa M. Cornel, Maud Plantinga, Ester Dünnebach, Jurgen Kuball, Jaap Jan Boelens, Stefan Nierkens, and Niek P. van Til**

# Supplemental Material

**Figure S1**

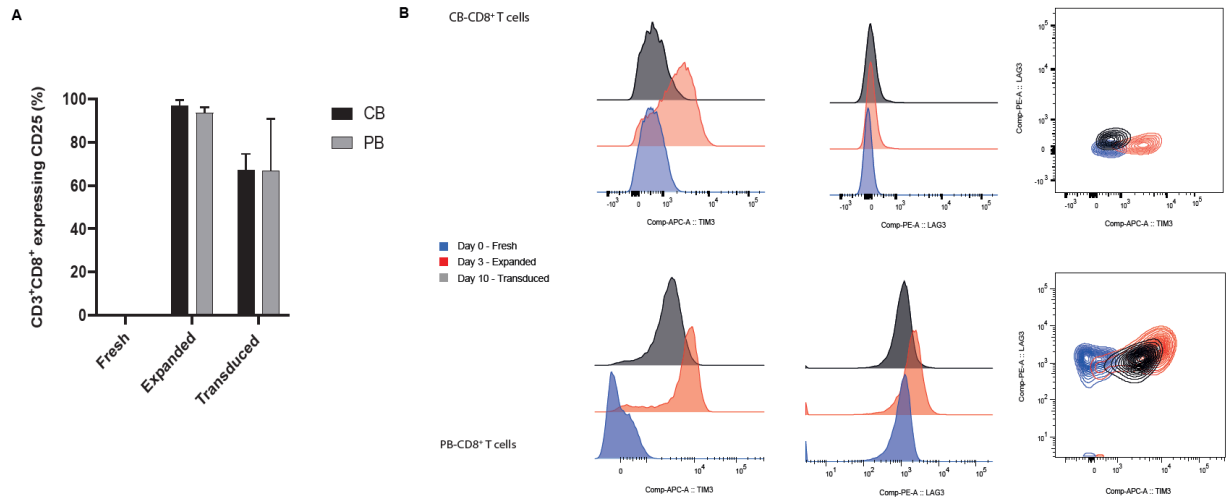

**Figure S1.** Expression of CD25, TIM3 and LAG3 in CB and PB CD8<sup>+</sup>T cells

(A) CD25 expression in CB (black) and PB (gray). (B) TIM3 and LAG3 expression histograms in both CB (top) and PB (bottom) CD3<sup>+</sup>CD8<sup>+</sup> T cells, in the three different time points: Day 0 – Fresh (blue), Day 3 - Expanded (red), Day 10 – Transduced (black). (C) Co-staining of TIM-3 and LAG-3 representative plots for both CB and PB CD3<sup>+</sup>CD8<sup>+</sup> T cells. The data corresponds to  $\geq 3$  independent experiments and are shown as average  $\pm$  standard deviation.

**Figure S2**

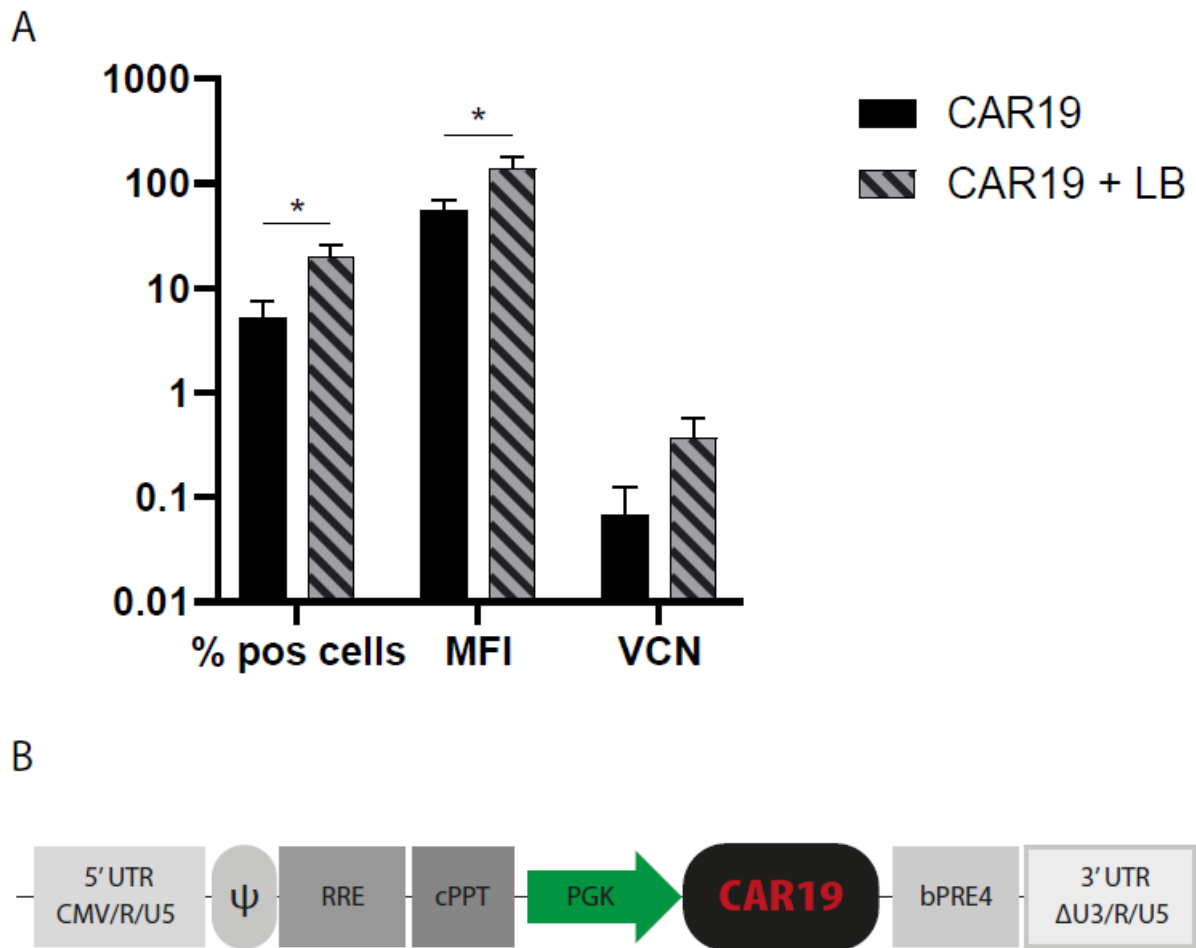

**Figure S2.** *LB increase transduction efficiency also with LV.CAR19 construct*

(A) CB CD8<sup>+</sup> T cells transduced with LV.CAR19 (MOI1) showed 5.2% ± 2.5 transduction efficiency (black), while the use of LB increased the % of transduced cells to 19.9 ± 5.9 (black stripes). The same trend is also visible for the MFI and the VCN. (B) Schematic representation of plasmid LV.CAR19 vector design. The data corresponds to ≥ 3 independent experiments and are shown as average ± standard deviation; p ≤ 0.05 (\*); p ≤ 0.01 (\*\*); p ≤ 0.001 (\*\*\*) ; p ≤ 0.0001 (\*\*\*\*).

**Figure S3**

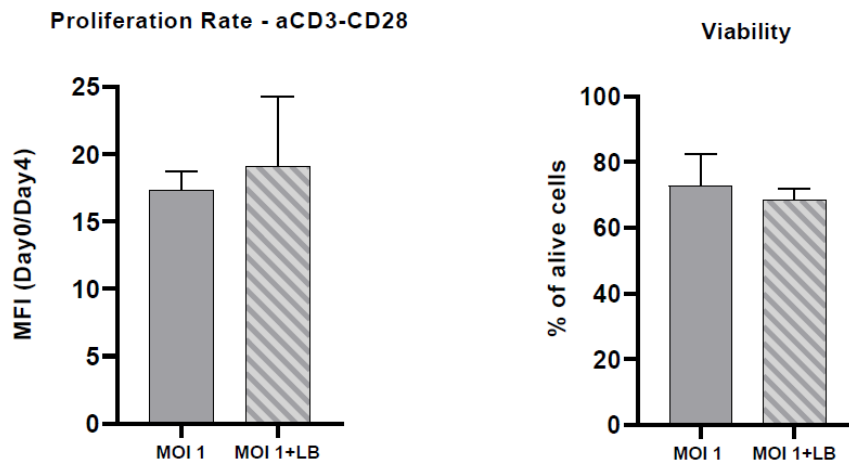

**Figure S3.** *LB effect on proliferation and cell viability on CB CD8<sup>+</sup> T cells transduced with an MOI 1*

(A) Proliferation rate after 4 days of aCD3/CD28 beads stimulation in CB CD8<sup>+</sup> T cells transduced with and MOI 1 in the presence of LB (gray stripes) compared to STND method (gray). (B) Cell viability analysis, 4 days after aCD3/CD28 beads stimulation, of CB CD8<sup>+</sup> T cells transduced with and MOI 1 in the presence of LB (gray stripes) compared to STND method (gray). The data corresponds to  $\geq 3$  independent experiments and are shown as average  $\pm$  standard deviation;  $p \leq 0.05$  (\*);  $p \leq 0.01$  (\*\*);  $p \leq 0.001$  (\*\*\*) ;  $p \leq 0.0001$  (\*\*\*\*).

**Figure S4**

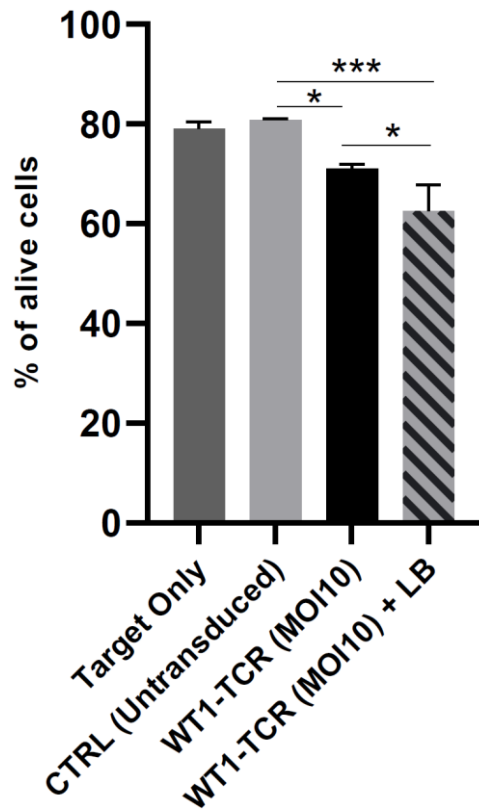

**Figure S4**

Killing capacity of WT1-TCR CB CD8<sup>+</sup>T cells transduced, in the presence or absence of LB, depicted as % of alive cells in a co-culture experiment with target cells loaded with pWT1<sub>126</sub>. Co-culture experiments were performed in a ratio of 10:1 (Target:Effector). The data corresponds to  $\geq 3$  independent experiments and are shown as average  $\pm$  standard deviation;  $p \leq 0.05$  (\*);  $p \leq 0.01$  (\*\*);  $p \leq 0.001$  (\*\*\*) ;  $p \leq 0.0001$  (\*\*\*\*).
